# Supplementary material for: Ammonia-free synthesis of lithium manganese iron phosphate cathodes via a co-precipitation reaction
Source: Royal Society of Chemistry journal article supplement (doi:10.1039/d4su00125g), 2024-01-01
Supplement: d4su00125g1.pdf [file d4su00125g1.pdf]

## Supplemental Information

### **Ammonia-free synthesis of lithium manganese iron phosphate cathodes via a co-precipitation reaction**

*Panawan Vanaphuti, Kevin Scanlan, and Arumugam Manthiram\**

*Materials Science and Engineering Program and Texas Materials Institute, The University of Texas at Austin, Austin, Texas 78712, USA*

\*Corresponding author. Tel: +1-512-471-1791; fax: +1-512-471-7681.

E-mail address: manth@austin.utexas.edu (A. Manthiram)

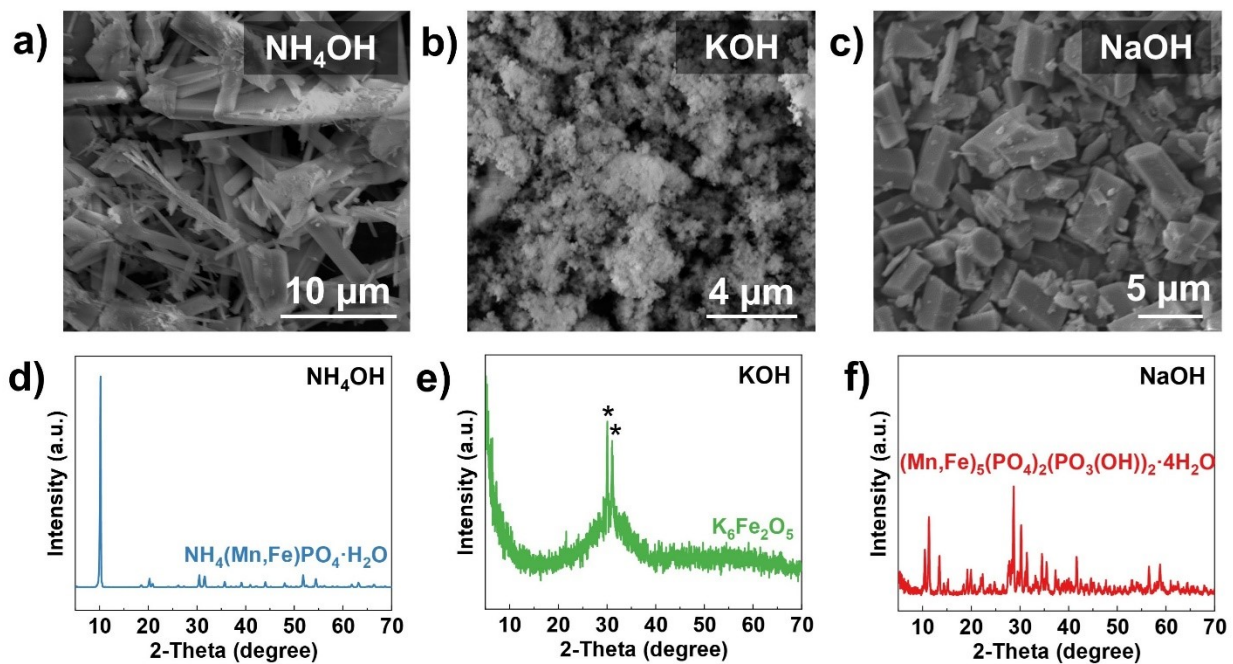

**Fig. S1** Morphological and structural analysis of the precursors obtained with different basic solutions, including (a, d)  $\text{NH}_4\text{OH}$ , (b, e)  $\text{KOH}$ , and (c, f)  $\text{NaOH}$ .

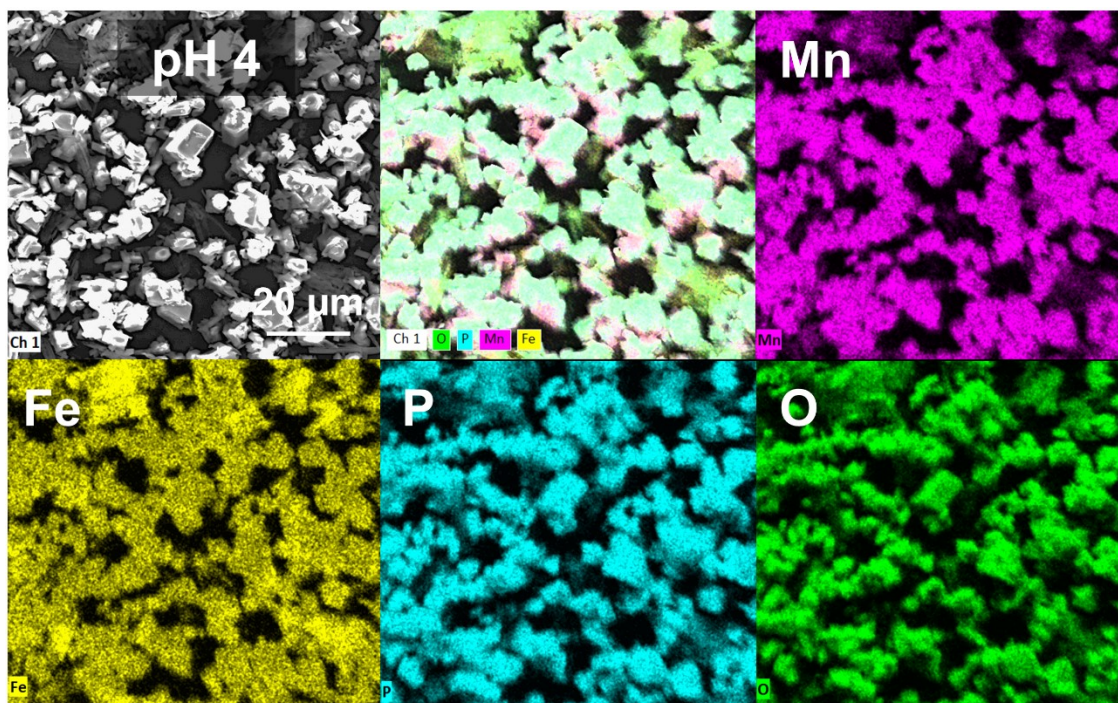

**Fig. S2** SEM-EDS images of the MFP precursors obtained at  $\text{pH} = 4$ , where the mapping shows the distribution of each element, including Mn, Fe, P, and O.



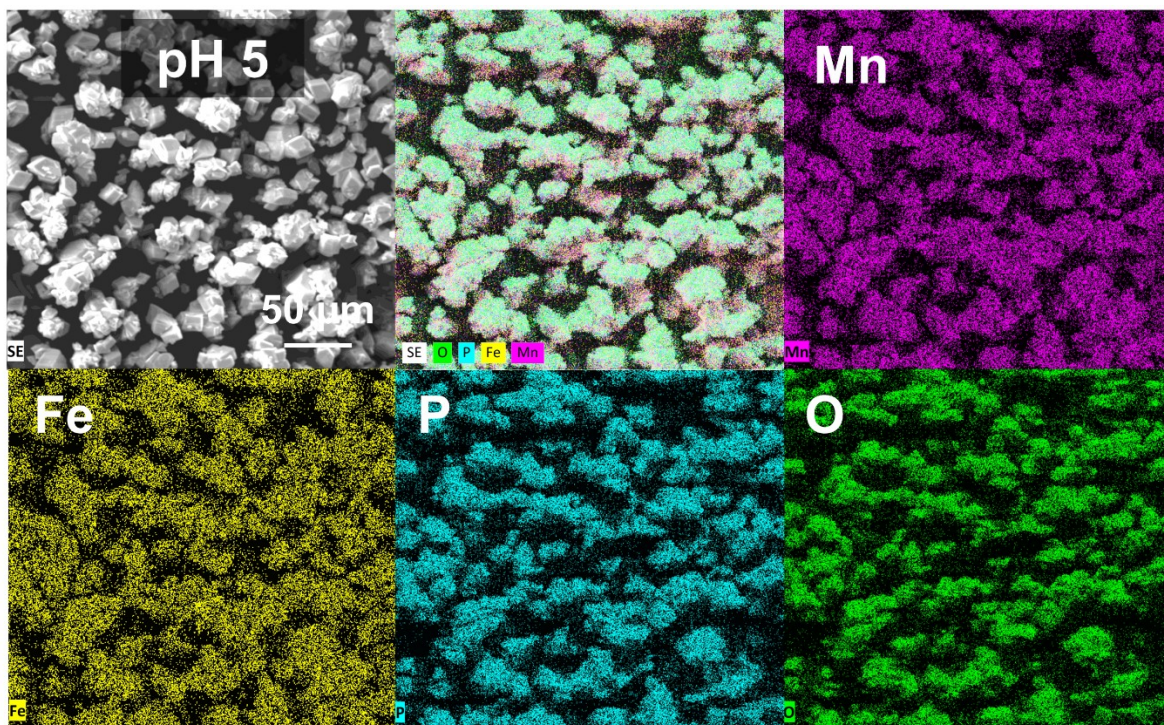

**Fig. S3** SEM-EDS images of the MFP precursors obtained at pH = 5, where the mapping shows the distribution of each element, including Mn, Fe, P, and O.

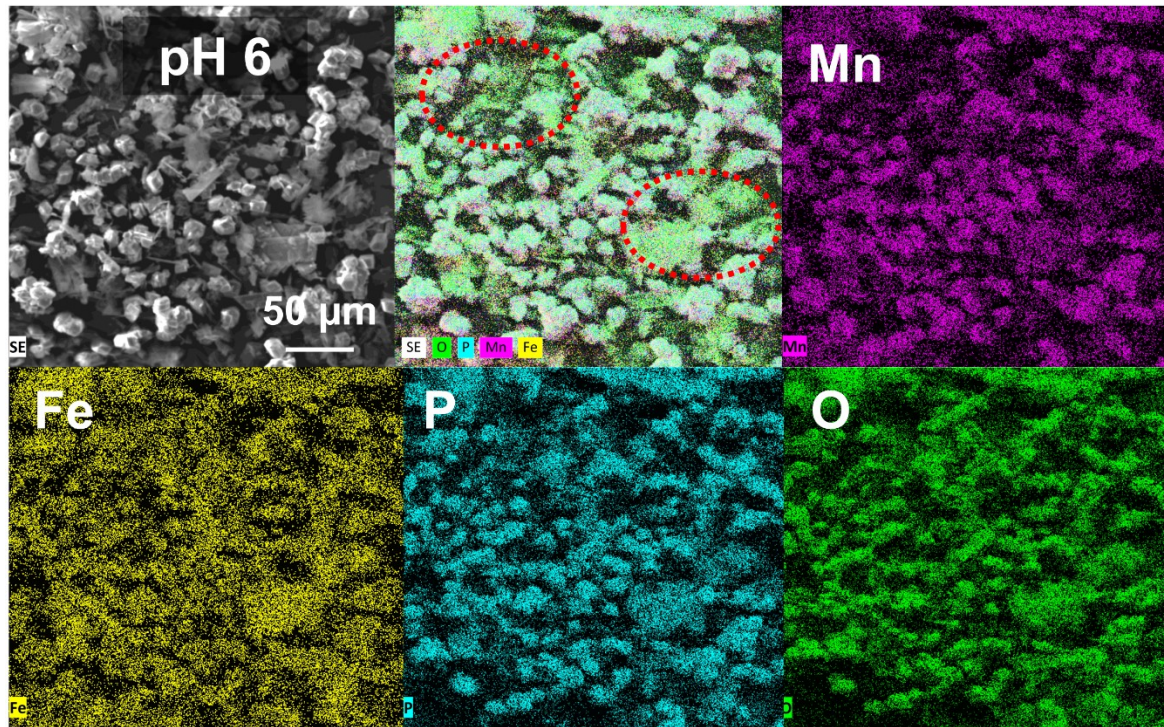

**Fig. S4** SEM-EDS images of the MFP precursors obtained at pH = 6, where the mapping shows the distribution of each element, including Mn, Fe, P, and O.



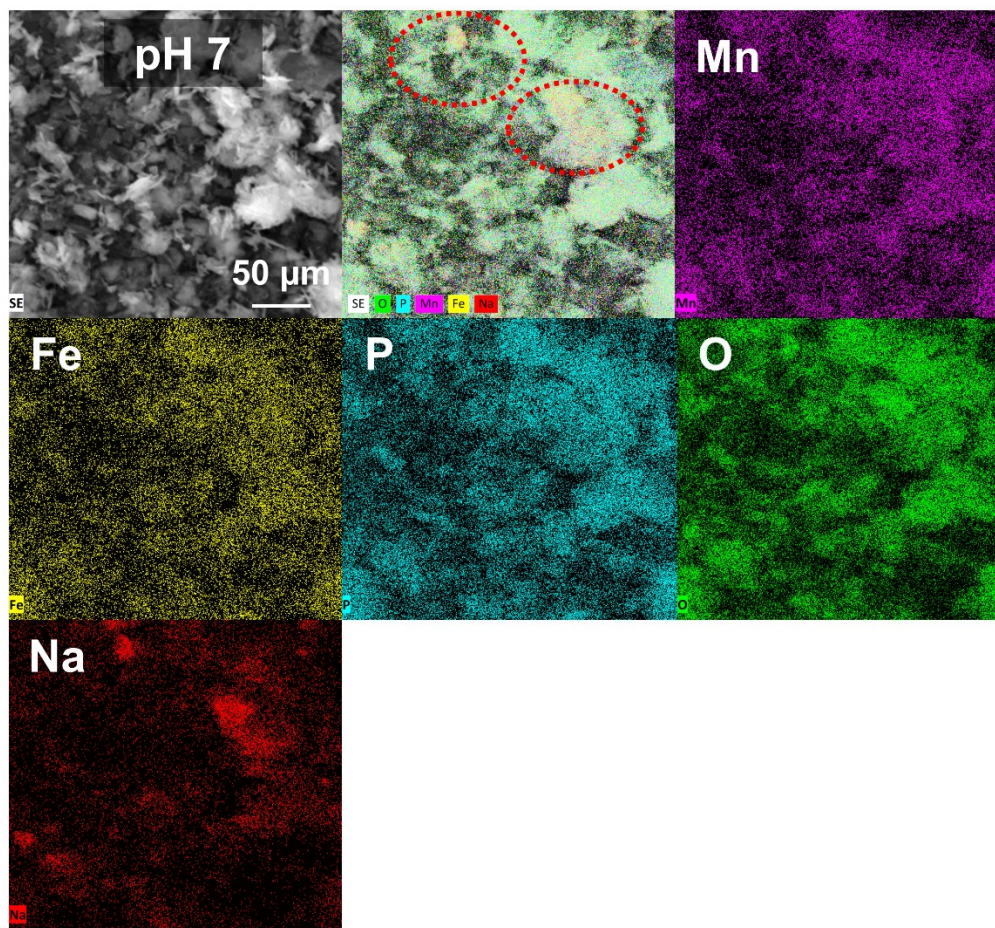

**Fig. S5** SEM-EDS images of the MFP precursors obtained at  $\text{pH} = 7$ , where the mapping shows the distribution of each element, including Mn, Fe, P, O, and Na.

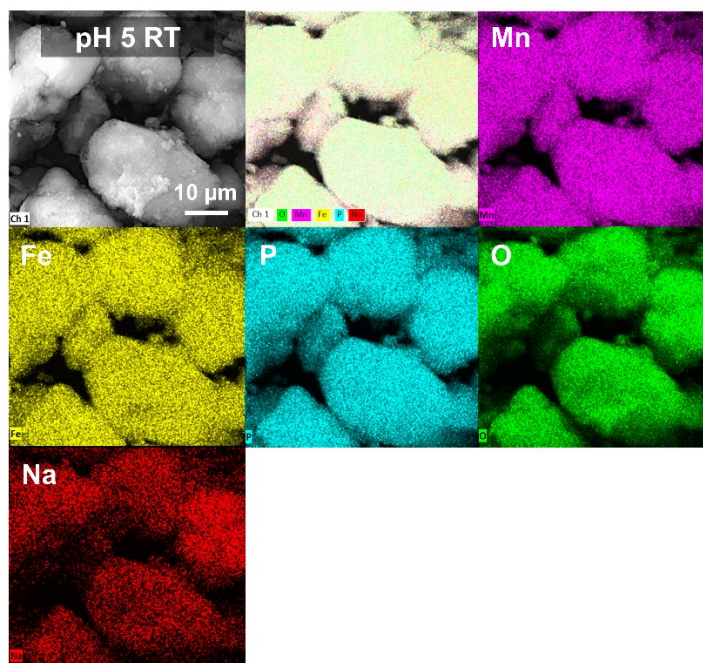

**Fig. S6** SEM-EDS images of the MFP precursors obtained at pH = 5 at room temperature (25 °C), where the mapping shows the distribution of each element, including Mn, Fe, P, O, and Na.

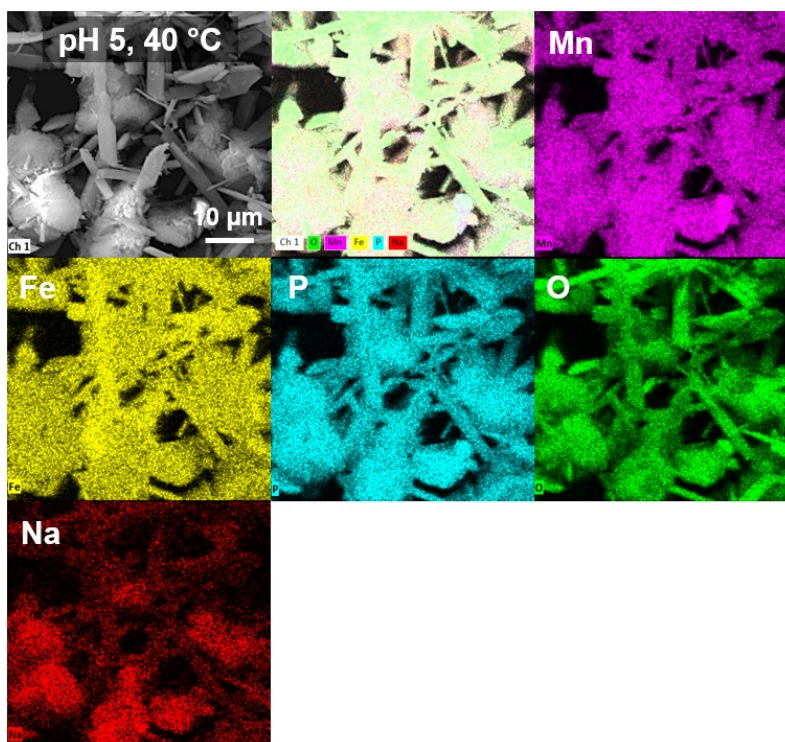

**Fig. S7** SEM-EDS images of the MFP precursors obtained at pH = 5 at 40 °C, where the mapping shows the distribution of each element, including Mn, Fe, P, O, and Na.



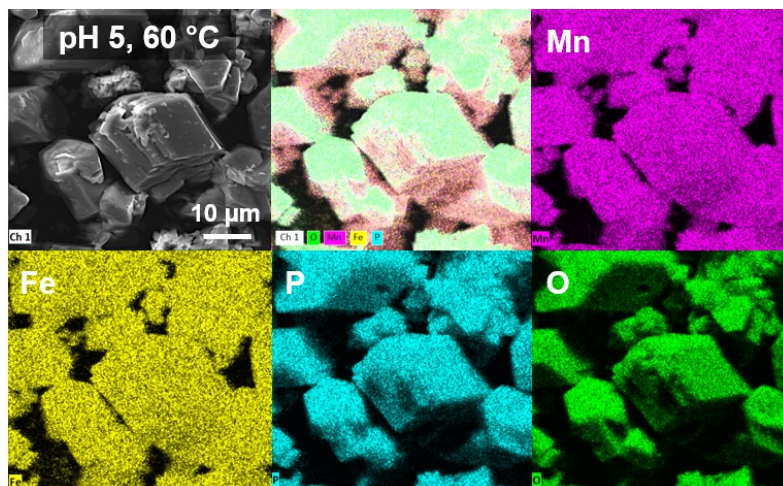

**Fig. S8** SEM-EDS images of the MFP precursors obtained at pH = 5 at 60 °C, where the mapping shows the distribution of each element, including Mn, Fe, P, and O.

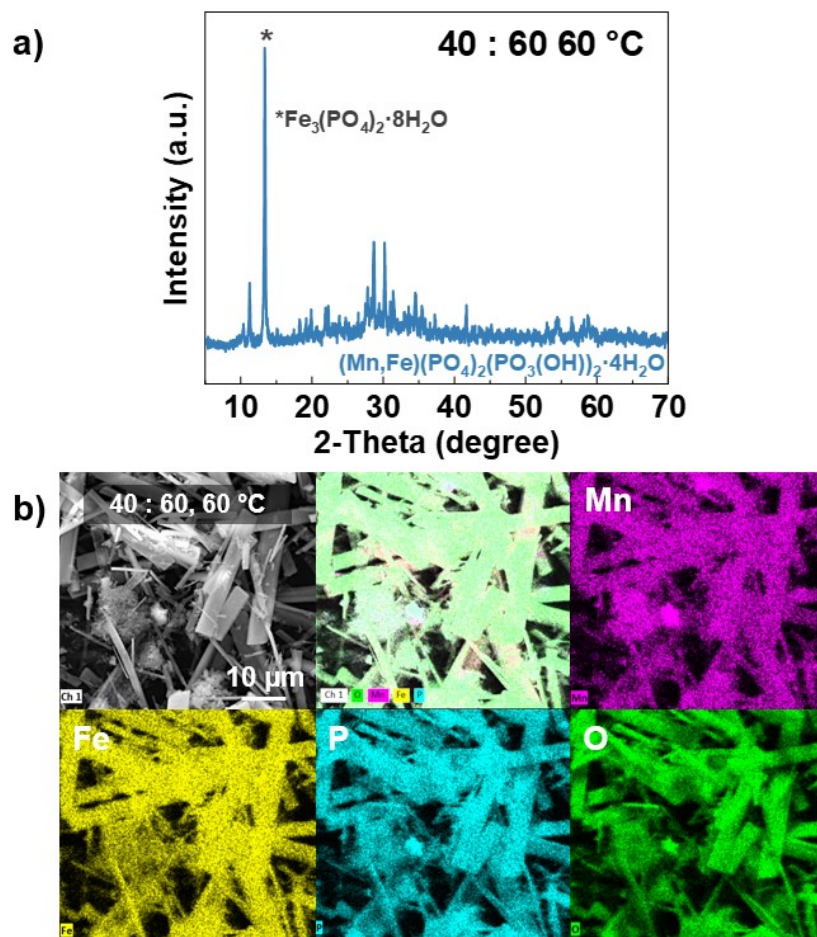

**Fig. S9** Morphological and structural analysis of the MFP precursor with an Mn : Fe ratio of 40 : 60 at 60 °C: (a) XRD pattern and (b) SEM-EDS mapping of each element, including Mn, Fe, P, and O.

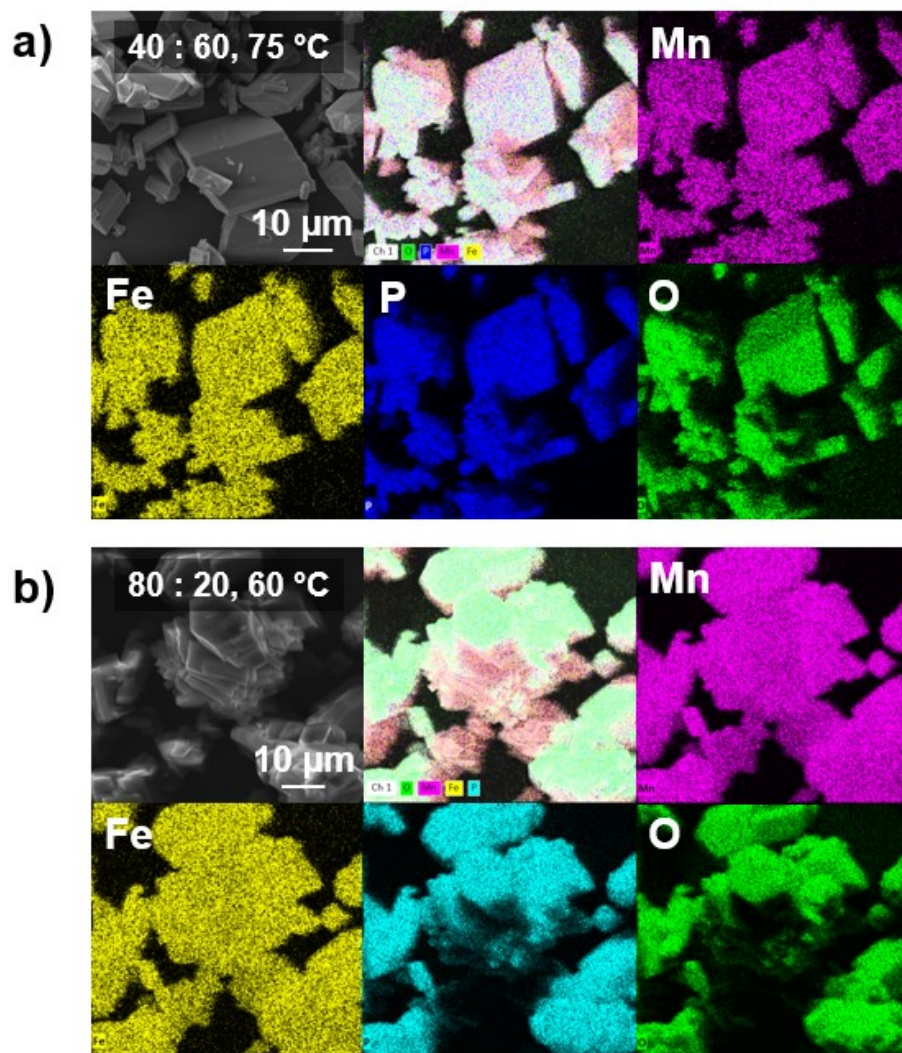

**Fig. S10** SEM-EDS mapping showing the distribution of each element, including Mn, Fe, P, and O for (a) Mn : Fe = 40 : 60 at 75 °C and (b) 80 : 20 at 60 °C.



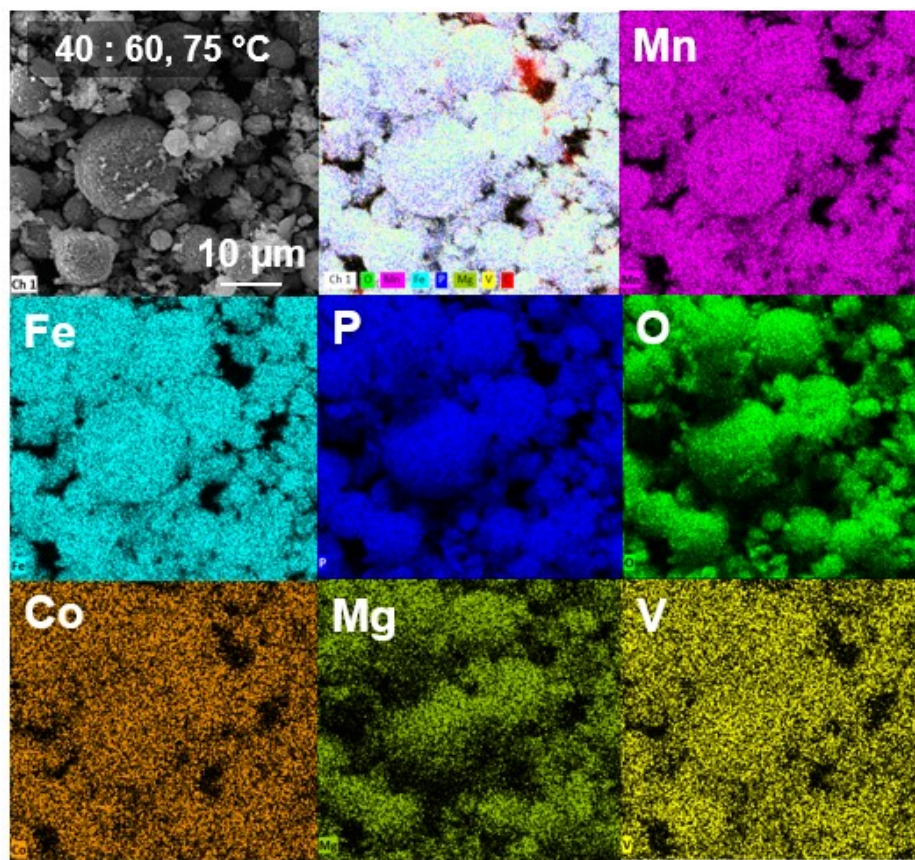

**Fig. S11** SEM-EDS mapping of the LMFP cathode with a Mn : Fe ratio of 40 : 60 at 75°C to examine the distribution of each element, including Mn, Fe, P, O, Co, Mg, and V.



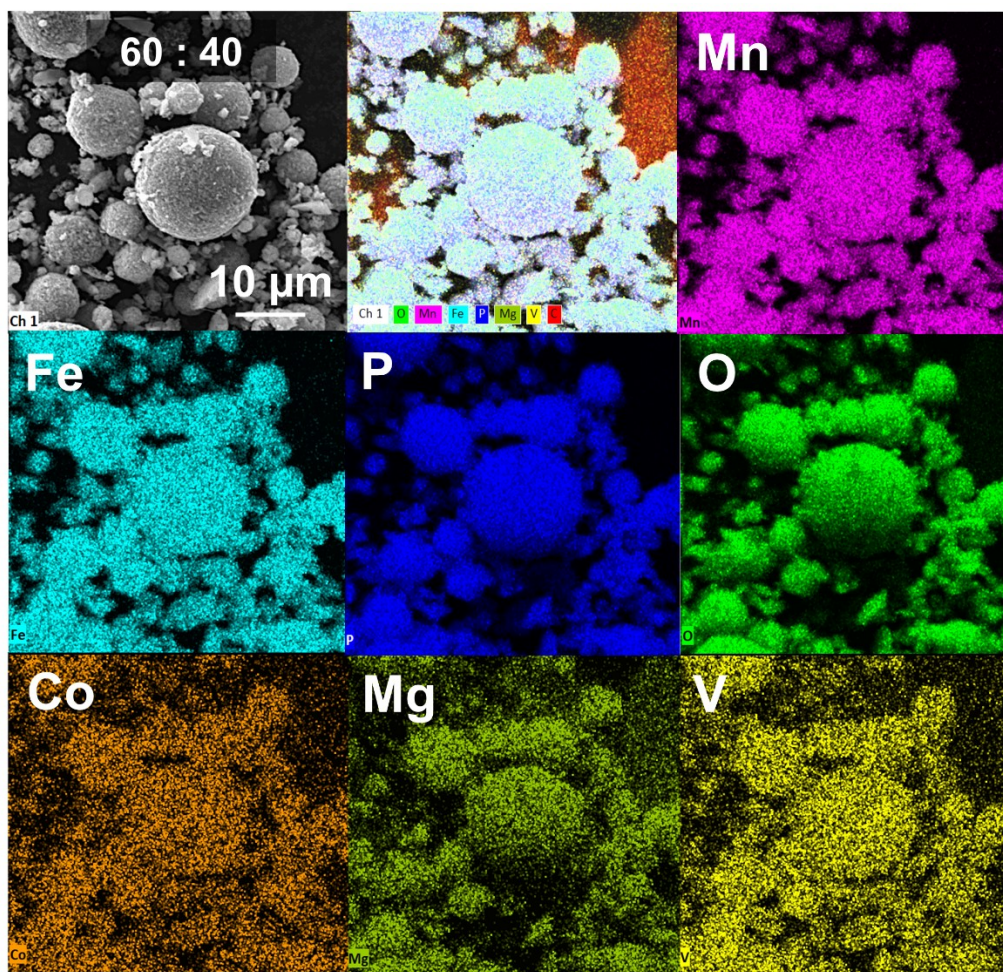

**Fig. S12** SEM-EDS mapping of the LMFP cathode with a Mn : Fe ratio of 60 : 40 to examine the distribution of each element, including Mn, Fe, P, O, Co, Mg, and V.

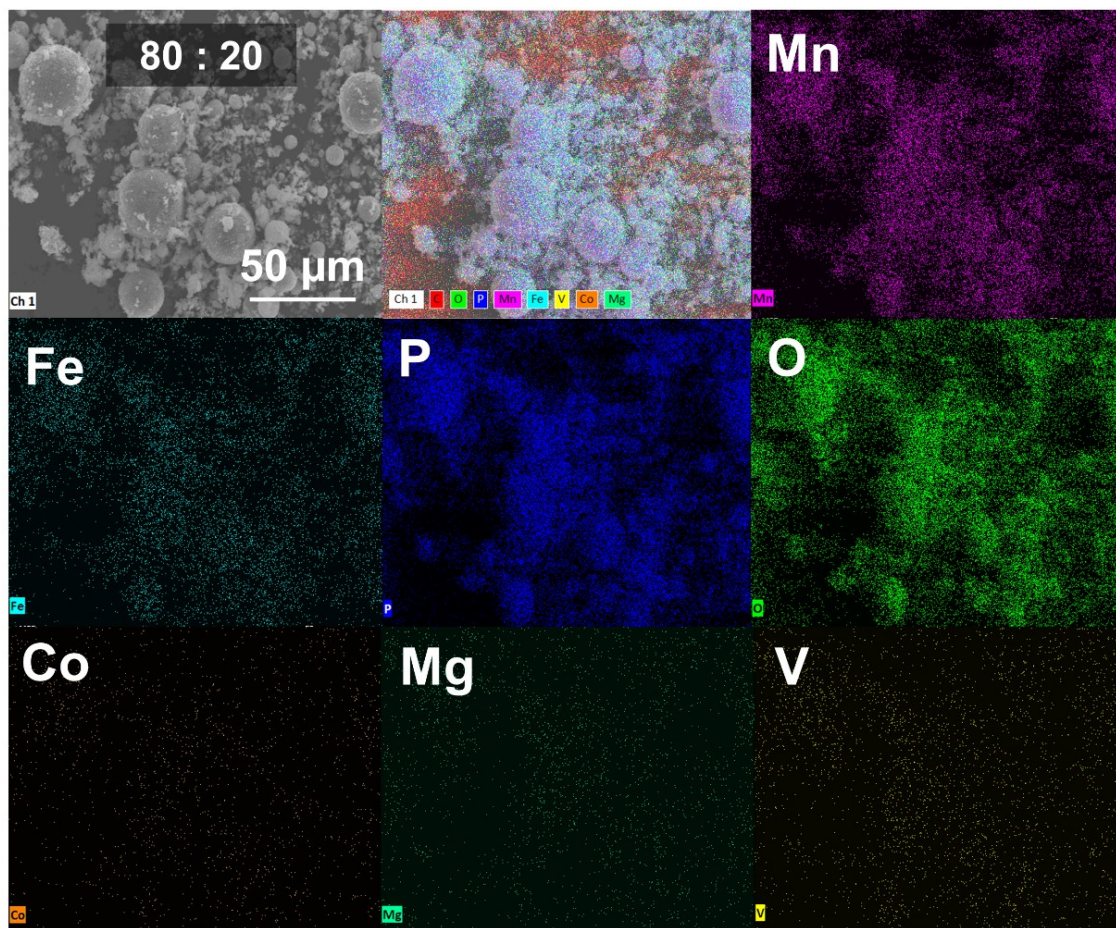

**Fig. S13** SEM-EDS mapping of the LMFP cathode with a Mn : Fe ratio of 80 : 20 to examine the distribution of each element, including Mn, Fe, P, O, Co, Mg, and V.



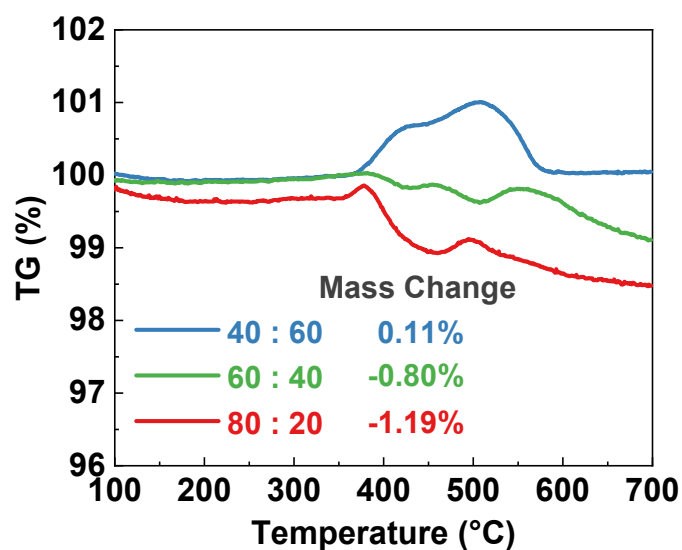

**Fig. S14** TGA profiles of the LMFP cathodes, showing the amount of carbon content for the 40 : 60, 60 : 40, and 80 : 20 samples

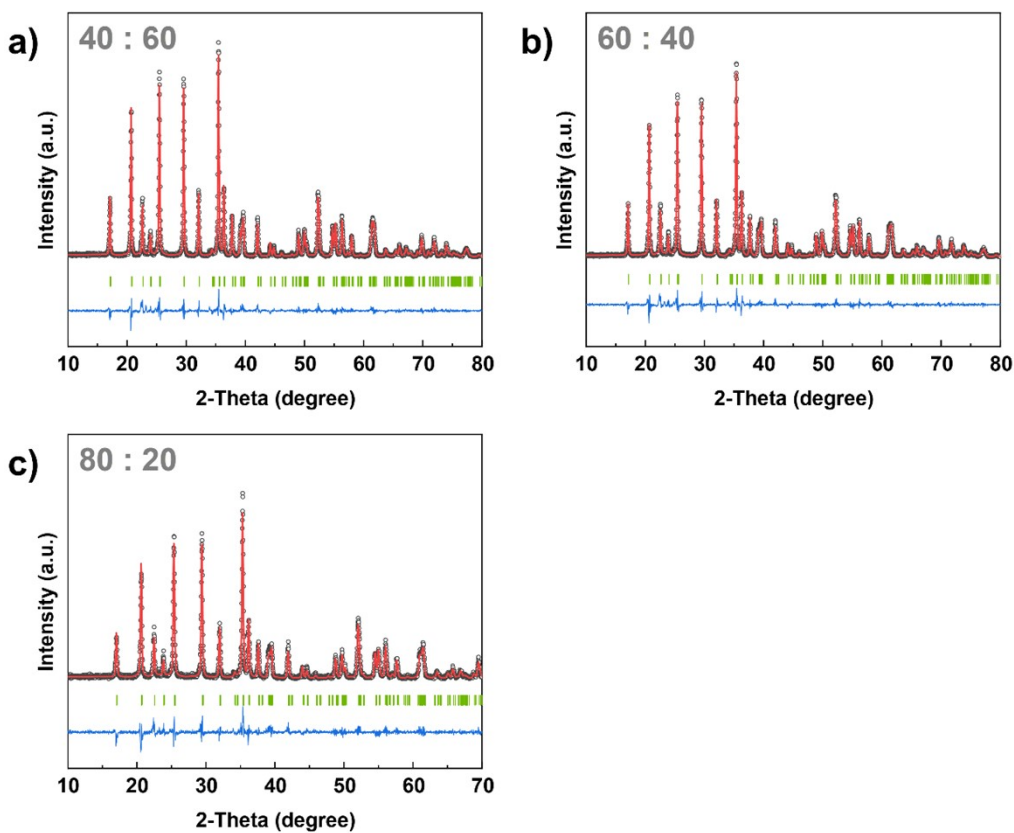

**Fig. S15** Rietveld refinement profiles of the LMFP cathodes with a Mn : Fe ratio of (a) 40 : 60, (b) 60 : 40, and (c) 80 : 20 with respect to the LMFP pattern (COD#2300354) as the reference pattern.

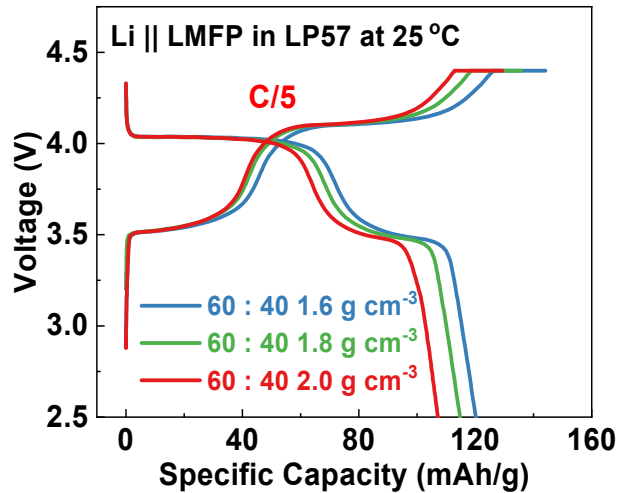

**Fig. S16** Charge-discharge profiles of the first cycle at C/5 rate for the Mn : Fe = 60 : 40 sample with different packing densities.



**Table S1** Elemental ratios of the precursors synthesized by the co-precipitation method as obtained from ICP-OES analysis with  $\text{FePO}_4$  as the reference

| Sample                      | Mn    | Fe    | P                                                                                                                                                                                     |
|-----------------------------|-------|-------|---------------------------------------------------------------------------------------------------------------------------------------------------------------------------------------|
| Target Ratio                | 0.600 | 0.400 | 0.67 for $\text{M}_2(\text{PO}_4)_3$ phase<br>0.80 for $(\text{Mn, Fe})_5(\text{PO}_4)_2(\text{HPO}_4)_2 \cdot 4\text{H}_2\text{O}$ phase<br>1.00 for $\text{NH}_4\text{MPO}_4$ phase |
| $\text{FePO}_4$ (Reference) | 0.001 | 0.999 | 1.057                                                                                                                                                                                 |
| MFP- $\text{NH}_4\text{OH}$ | 0.608 | 0.392 | 1.030                                                                                                                                                                                 |
| MFP-KOH                     | 0.593 | 0.407 | 0.805                                                                                                                                                                                 |
| MFP-NaOH                    | 0.661 | 0.339 | 0.818                                                                                                                                                                                 |
| MFP-pH 4                    | 0.679 | 0.321 | 0.850                                                                                                                                                                                 |
| MFP-pH 5                    | 0.617 | 0.383 | 0.841                                                                                                                                                                                 |
| MFP-pH 5-CA                 | 0.704 | 0.296 | 0.844                                                                                                                                                                                 |
| MFP-pH 7                    | 0.606 | 0.394 | 0.711                                                                                                                                                                                 |
| MFP-pH 5-RT                 | 0.588 | 0.412 | 0.746                                                                                                                                                                                 |
| MFP-pH 5-40 °C              | 0.524 | 0.476 | 0.722                                                                                                                                                                                 |
| MFP-pH 5-60 °C              | 0.620 | 0.380 | 0.828                                                                                                                                                                                 |

**Table S2** Crystallographic data of LMFP (COD#2300354) used for performing the Rietveld refinement analysis

| Parameter                 | $\text{LiMn}_{0.5}\text{Fe}_{0.5}\text{PO}_4$ |
|---------------------------|-----------------------------------------------|
| Space Group               | -P 2ac 2n (62)                                |
| a-axis (Å)                | 10.4072                                       |
| b-axis (Å)                | 6.06188                                       |
| c-axis (Å)                | 4.73357                                       |
| $\alpha=\beta=\gamma$ (°) | 90.00                                         |
| V (Å <sup>3</sup> )       | 298.628                                       |
| Radiation                 | Cu $K\alpha_1$ (1.5405 Å)                     |

**Table S3** Structural information of LMFP (COD#2300354) used for performing the Rietveld refinement analysis

| <b>Element</b> | <b>Label</b> | <b>x</b> | <b>y</b> | <b>z</b> | <b>B</b> | <b>Occupancy</b> |
|----------------|--------------|----------|----------|----------|----------|------------------|
| Li             | Li1          | 0        | 0        | 0        | 0        | 0.996            |
| Fe             | Fe1          | 0.2828   | 0.25     | 0.9705   | 0        | 0.498            |
| Mn             | Mn1          | 0.2828   | 0.25     | 0.9705   | 0        | 0.498            |
| P              | P1           | 0.0952   | 0.25     | 0.4169   | 0        | 1                |
| O              | O1           | 0.0939   | 0.25     | 0.731    | 0        | 1                |
| O              | O2           | 0.4495   | 0.25     | 0.2062   | 0        | 1                |
| O              | O3           | 0.1604   | 0.0537   | 0.2778   | 0        | 1                |
| Fe             | Fe2          | 0        | 0        | 0        | 0        | 0.002            |
| Mn             | Mn2          | 0        | 0        | 0        | 0        | 0.002            |
| Li             | Li2          | 0.2828   | 0.25     | 0.9705   | 0        | 0.004            |
